# Supplementary material for: Fine control of Ce doped CH 3 NH 3 PbBr 3 to modulate photoluminescence and carrier characteristics for application in photoconductive photodetectors
Source: Royal Society of Chemistry journal article supplement (doi:10.1039/d4tc02379j), 2024-01-01
Supplement: d4tc02379j1.pdf [file d4tc02379j1.pdf]

## Supporting Information

# Fine control of Ce doped $\text{CH}_3\text{NH}_3\text{PbBr}_3$ to modulate photoluminescence and carrier characteristics for application in photoconductive photodetector

Xuyang Liu<sup>a,#</sup>, Chao Shi<sup>b,#</sup>, Dongxu Guang<sup>b</sup>, Lijuan Yao<sup>b</sup>, Bobo Li<sup>a,\*</sup>,  
Xuan Fang<sup>b,\*</sup>, Mingxia Qiu<sup>a,\*</sup>, Dan Wu<sup>a</sup>, Peigang Han<sup>a</sup>

a. College of New Materials and New Energies, Shenzhen Technology University, Shenzhen, 518118, P. R. China.

b. State Key Laboratory of High Power Semiconductor Lasers, School of Physics, Changchun University of Science and Technology, 7089 Weixing Road, Changchun, 130022, P. R. China.

#Xuyang Liu and Chao Shi contributed equally to this work.

\*Corresponding author: [libobo@sztu.edu.cn](mailto:libobo@sztu.edu.cn), [fangx@cust.edu.cn](mailto:fangx@cust.edu.cn),  
[qiumingxia@sztu.edu.cn](mailto:qiumingxia@sztu.edu.cn)

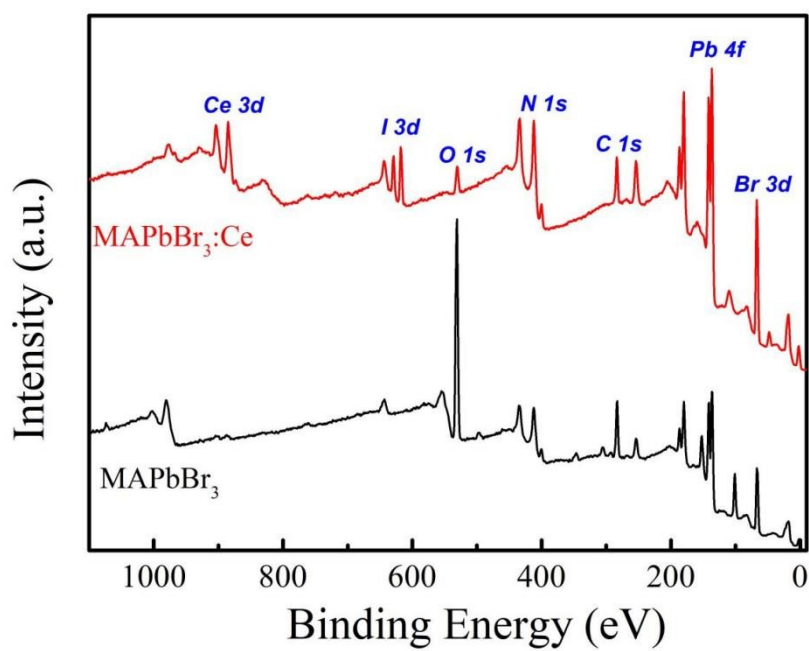

**Figure S1.** XPS spectra of MAPbBr<sub>3</sub> and MAPbBr<sub>3</sub>:Ce films.

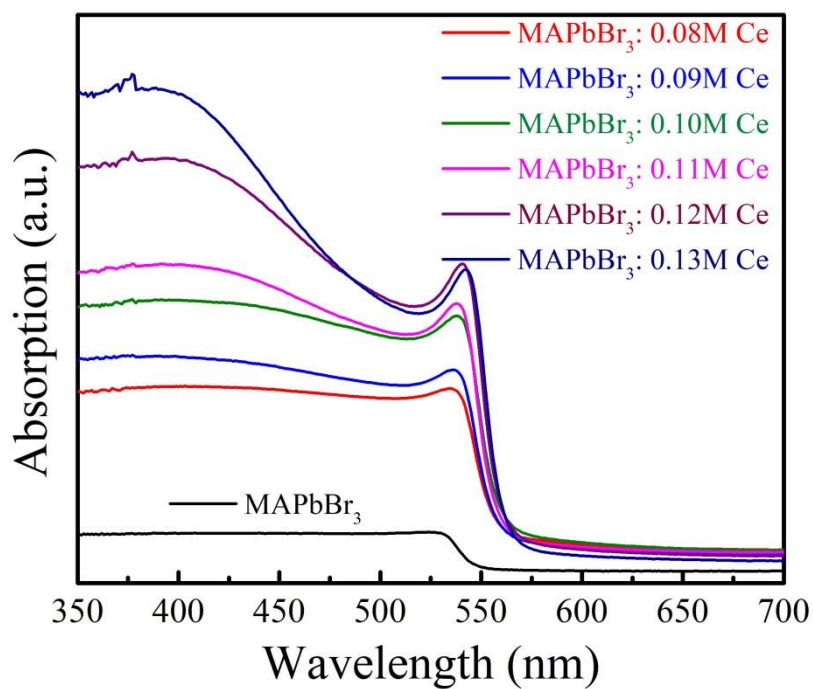

**Figure S2.** Absorption spectra of pristine MAPbBr<sub>3</sub> and MAPbBr<sub>3</sub>:Ce films.

**Table S1.** The measured parameters of PL lifetime. (No. 0, 0.08, 0.09, 0.10, 0.11, 0.12 and 0.13 represent the samples of MAPbBr<sub>3</sub>, MAPbBr<sub>3</sub>:0.08M Ce, MAPbBr<sub>3</sub>:0.09M Ce, MAPbBr<sub>3</sub>:0.10M Ce, MAPbBr<sub>3</sub>:0.11M Ce, MAPbBr<sub>3</sub>:0.12M Ce and MAPbBr<sub>3</sub>:0.13M Ce, respectively).

| Sample/<br>Parameter | 0        | 0.08     | 0.09     | 0.10     | 0.11     | 0.12     | 0.13     |
|----------------------|----------|----------|----------|----------|----------|----------|----------|
| A <sub>1</sub>       | 6284.321 | 5433.825 | 6980.758 | 7111.302 | 5833.148 | 4996.553 | 1423.611 |
| τ <sub>1</sub>       | 0.27457  | 0.11027  | 1.44529  | 1.85004  | 2.5477   | 3.06121  | 0.21214  |
| A <sub>2</sub>       | 4060.192 | 4236.543 | 3256.217 | 12639.8  | 4000.897 | 4363.25  | 8628.462 |
| τ <sub>2</sub>       | 1.15137  | 1.03505  | 0.50859  | 0.03052  | 7.63663  | 3.06109  | 1.57833  |
| A <sub>3</sub>       | 492.63   | 967.2116 | 636.3093 | 932.1124 | 230.6576 | 937.315  | 1742.004 |
| τ <sub>3</sub>       | 4.3409   | 4.27751  | 4.71459  | 6.02656  | 54.00498 | 9.80396  | 4.82135  |
| τ <sub>avg</sub>     | 1.772981 | 2.444994 | 2.00523  | 3.037938 | 16.31051 | 4.698584 | 2.780197 |

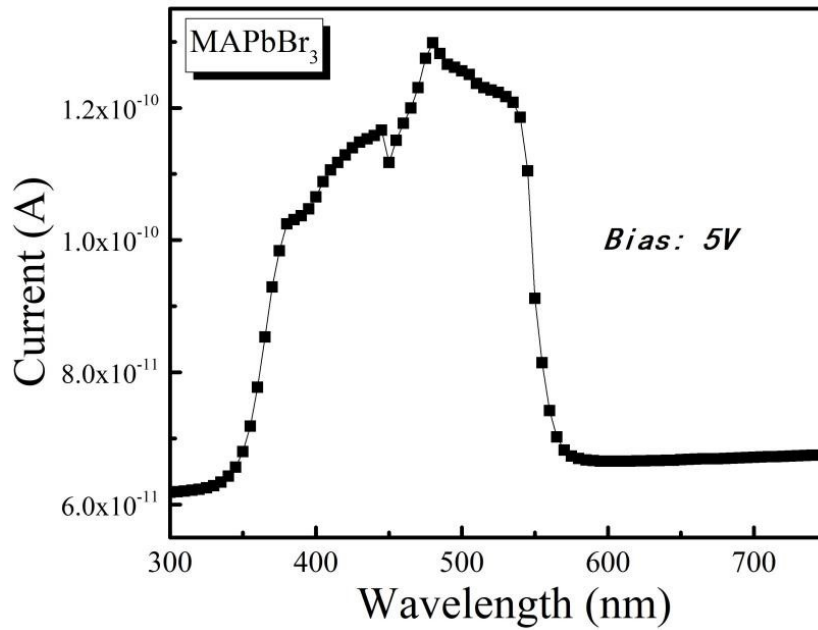

**Figure S3.** The photocurrent vs. wavelength for MAPbBr<sub>3</sub> based device under the bias voltage of 5 V.

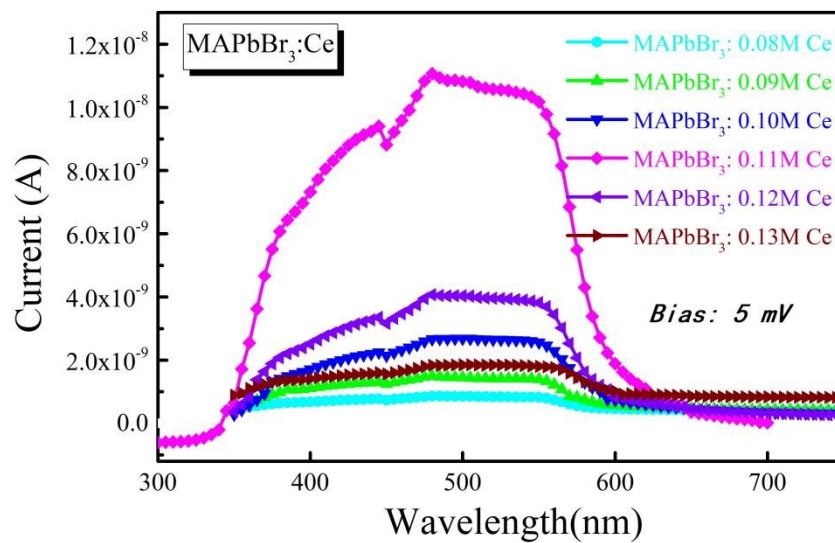

**Figure S4.** The photocurrent vs. wavelength for MAPbBr<sub>3</sub>:Ce based devices under the bias voltage of 5 mV.

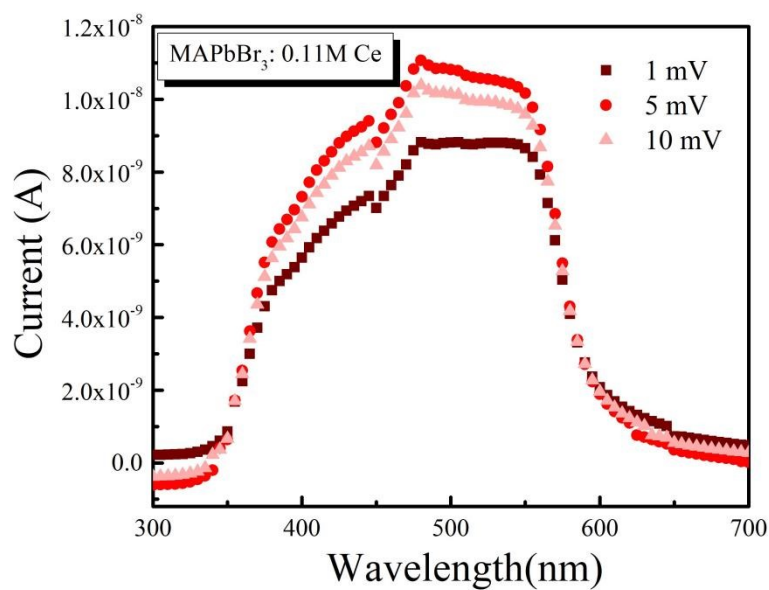

**Figure S5.** The photocurrent vs. wavelength for MAPbBr<sub>3</sub>:0.11M Ce based device under different bias voltage.

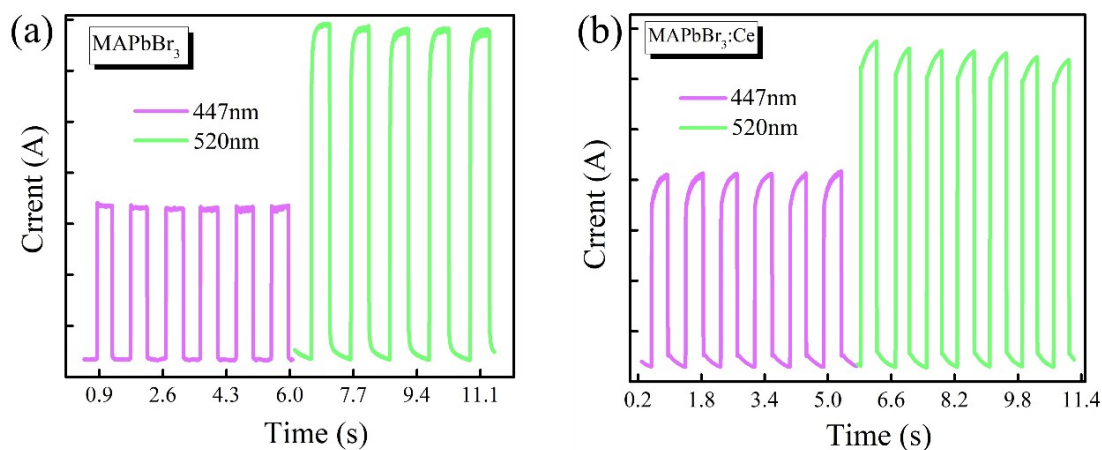

**Figure S6.** The on-off curves for (a) MAPbBr<sub>3</sub> and (b) MAPbBr<sub>3</sub>:0.11M Ce based device under different excitation wavelength.

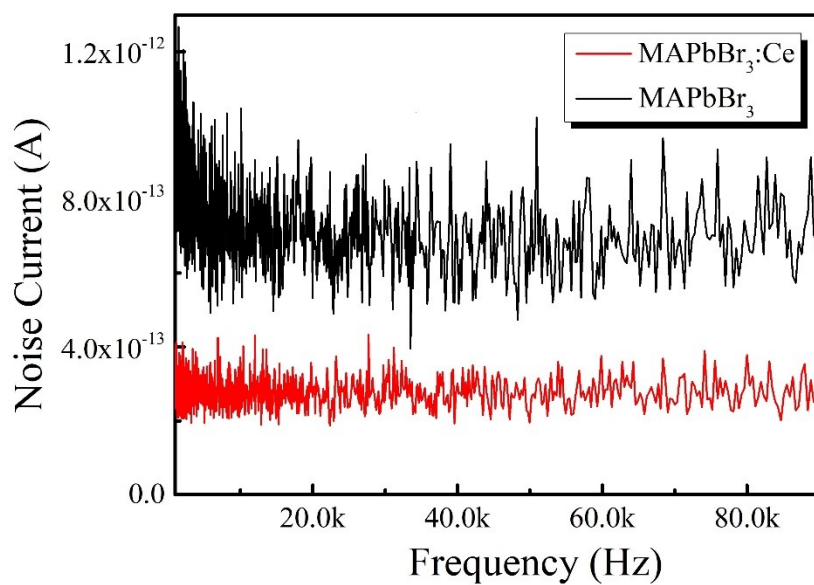

**Figure S7.** The frequency dependent noise current for MAPbBr<sub>3</sub> and MAPbBr<sub>3</sub>:Ce based devices, respectively.

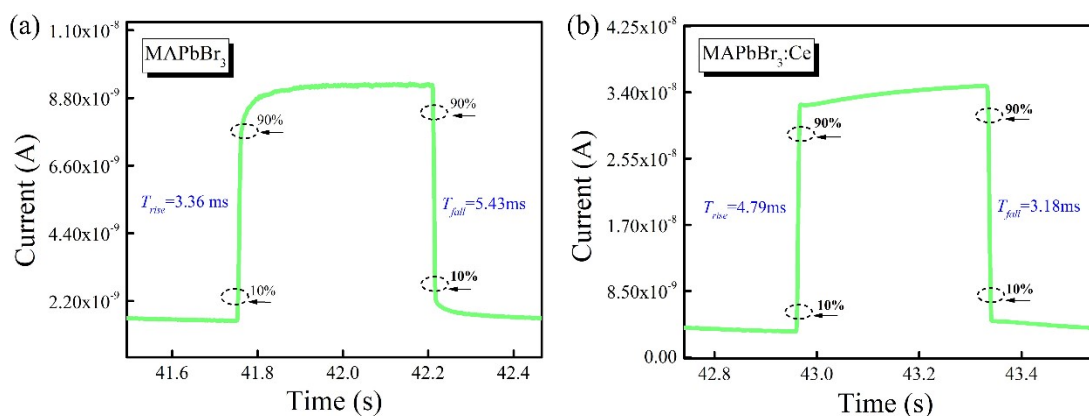

**Figure S8.** The responsive time for (a) MAPbBr<sub>3</sub> and (b) MAPbBr<sub>3</sub>:0.11M Ce based device under 520 nm light illumination.

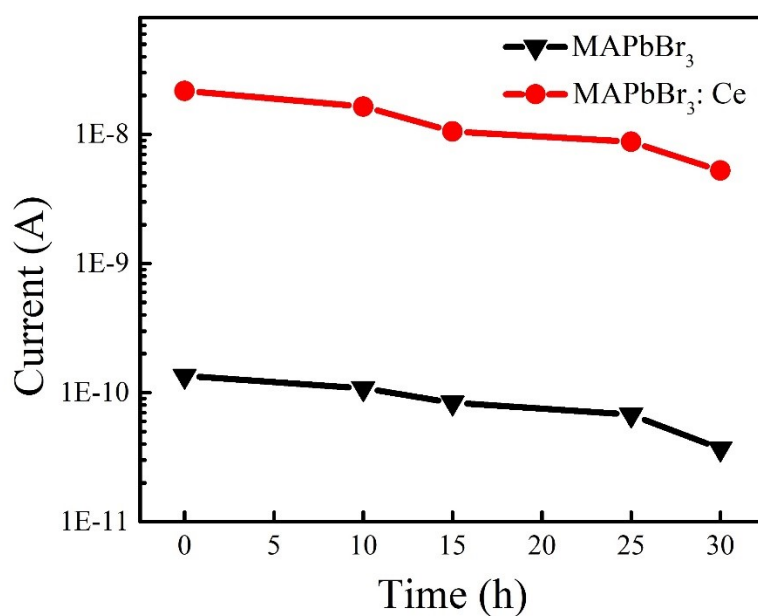

**Figure S9.** The stability of MAPbBr<sub>3</sub> and MAPbBr<sub>3</sub>:Ce based devices under 520 nm light illumination.
